# Supplementary material
Source: HighWire-hosted journal article supplement (https://ijgc.bmj.com/content/31/6/875)
Supplement: inline-supplementary-material-1 [file inline-supplementary-material-1.pdf]

**Bevacizumab, carboplatin and paclitaxel in the first line treatment of advanced ovarian cancer patients. The phase IV MITO-16A/MaNGO-OV2A study.**

**Appendix**

|                                                                                                                                                                                                                                            |    |
|--------------------------------------------------------------------------------------------------------------------------------------------------------------------------------------------------------------------------------------------|----|
| Figure A1. Study flow.....                                                                                                                                                                                                                 | 2  |
| Figure A2. Reverse Kaplan Meier follow up curve.....                                                                                                                                                                                       | 2  |
| Figure A3. PFS and OS Kaplan-Meier curves .....                                                                                                                                                                                            | 4  |
| Figure A4. PFS (left) and OS (right) Kaplan Meier curves according to stage of disease .....                                                                                                                                               | 4  |
| Figure A5. PFS (left) and OS (right) Kaplan Meier curves according to ECOG performance status .....                                                                                                                                        | 6  |
| Figure A6. PFS (left) and OS (right) Kaplan Meier curves according to residual disease after initial debulking surgery .....                                                                                                               | 7  |
| Figure A7. PFS (left) and OS (right) Kaplan Meier curves according to baseline hypertension/antihypertensive treatment .....                                                                                                               | 8  |
| Figure A8. PFS (left) and OS (right) Simon and Makush's modified Kaplan Meier curves according to occurrence of hypertension (grade $\geq 2$ ) during treatment. Inner graph: cumulative frequency of hypertension (grade $\geq 2$ ) ..... | 9  |
| Table A1: Adverse events occurring in <5% of patients, ordered by CTCAE category and grade .....                                                                                                                                           | 10 |
| Table A2. Summary of compliance .....                                                                                                                                                                                                      | 14 |
| List of participating Institutions, physicians, nurses and trial coordinators/data managers .....                                                                                                                                          | 15 |

**Figure A1. Study flow**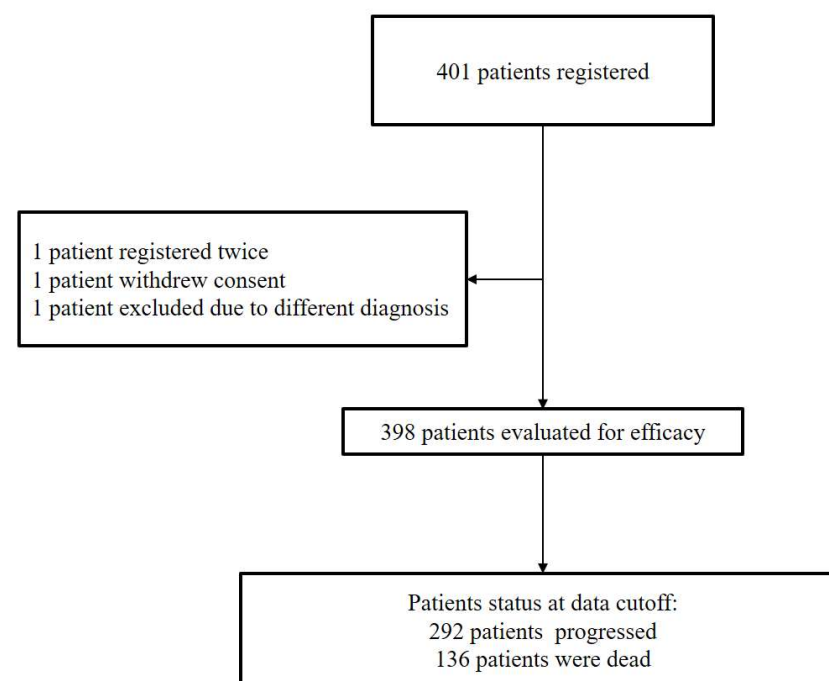

Figure A2. Reverse Kaplan Meier follow up curve

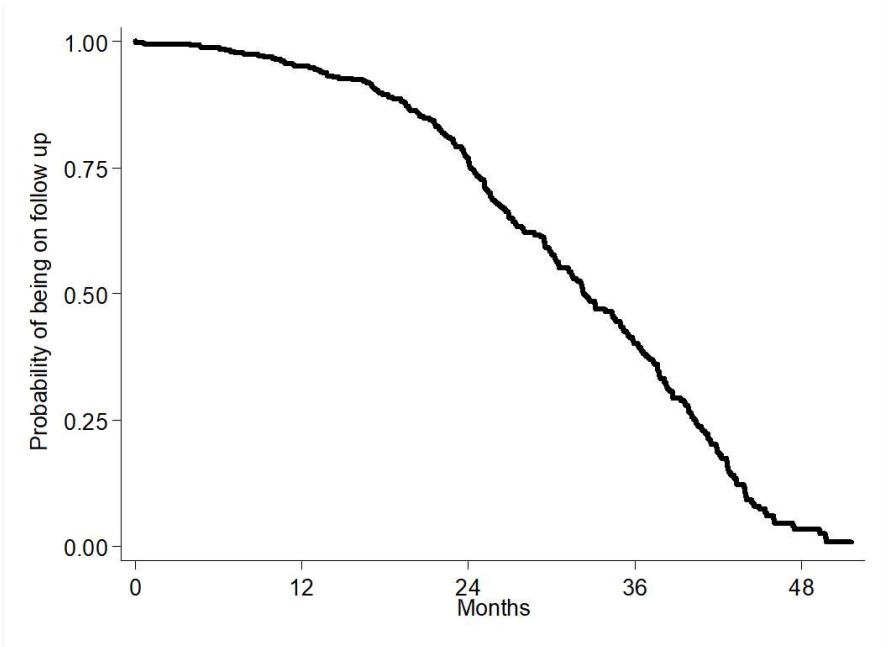

Figure A3. PFS and OS Kaplan-Meier curves

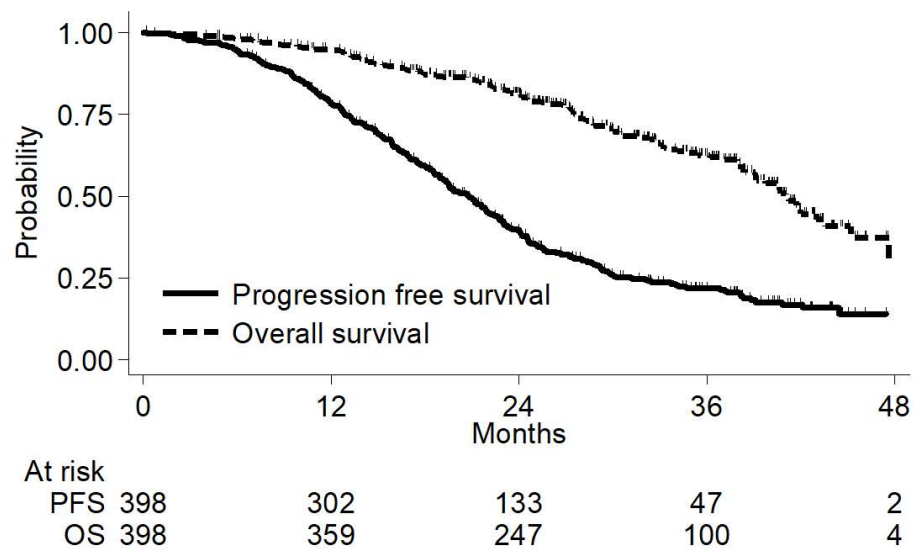

Figure A4. PFS (left) and OS (right) Kaplan Meier curves according to stage of disease

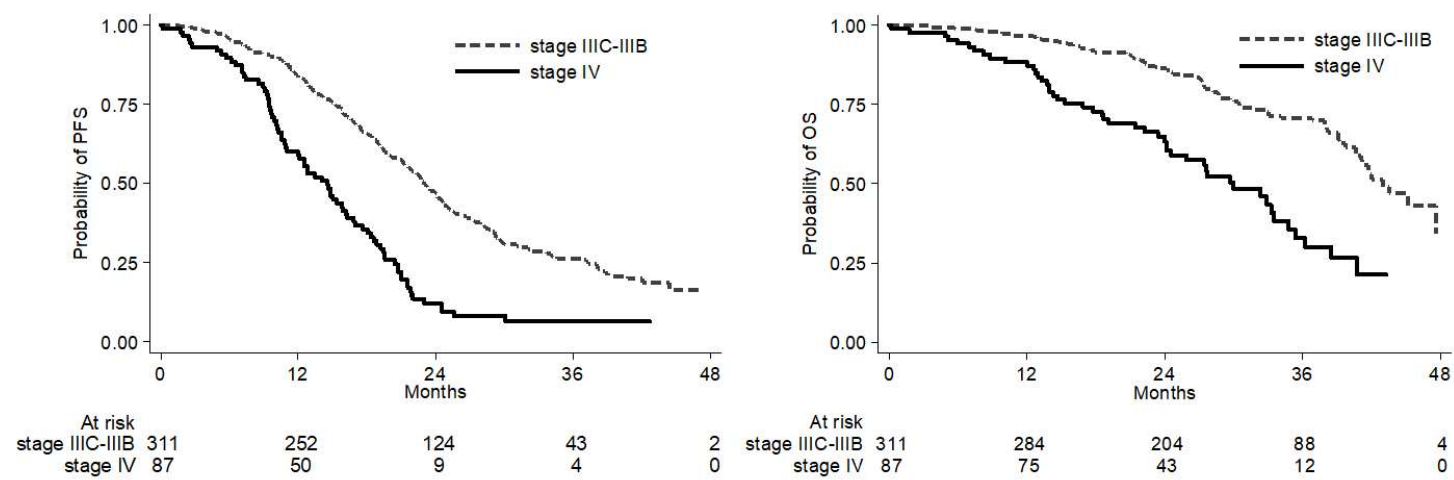

**Figure A5. PFS (left) and OS (right) Kaplan Meier curves according to ECOG performance status**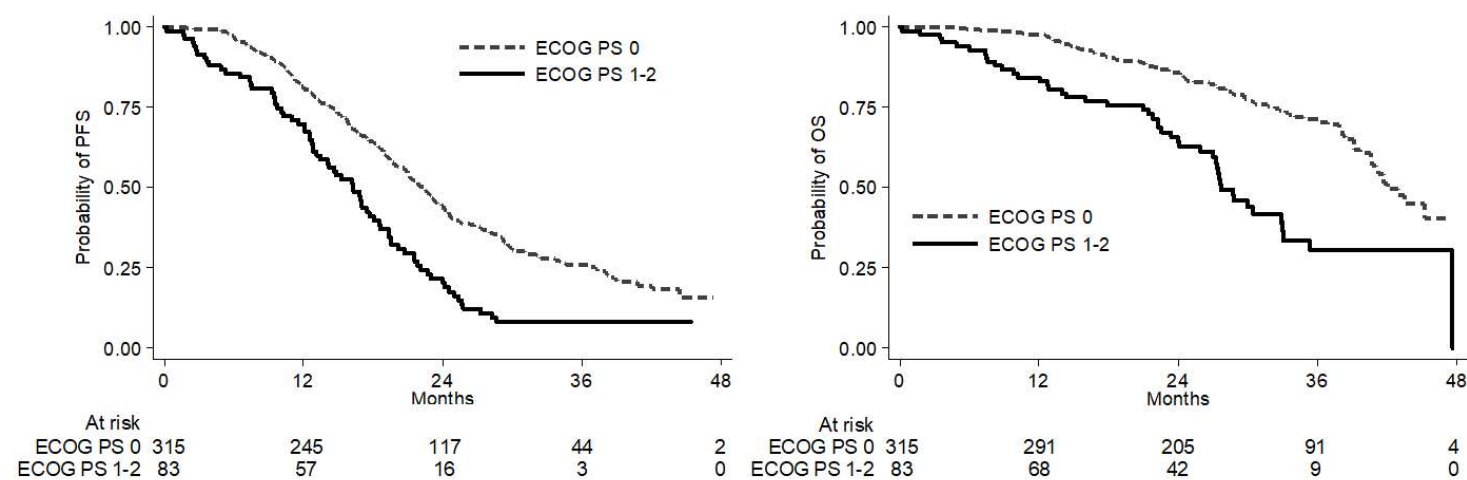

**Figure A6. PFS (left) and OS (right) Kaplan Meier curves according to residual disease after initial debulking surgery**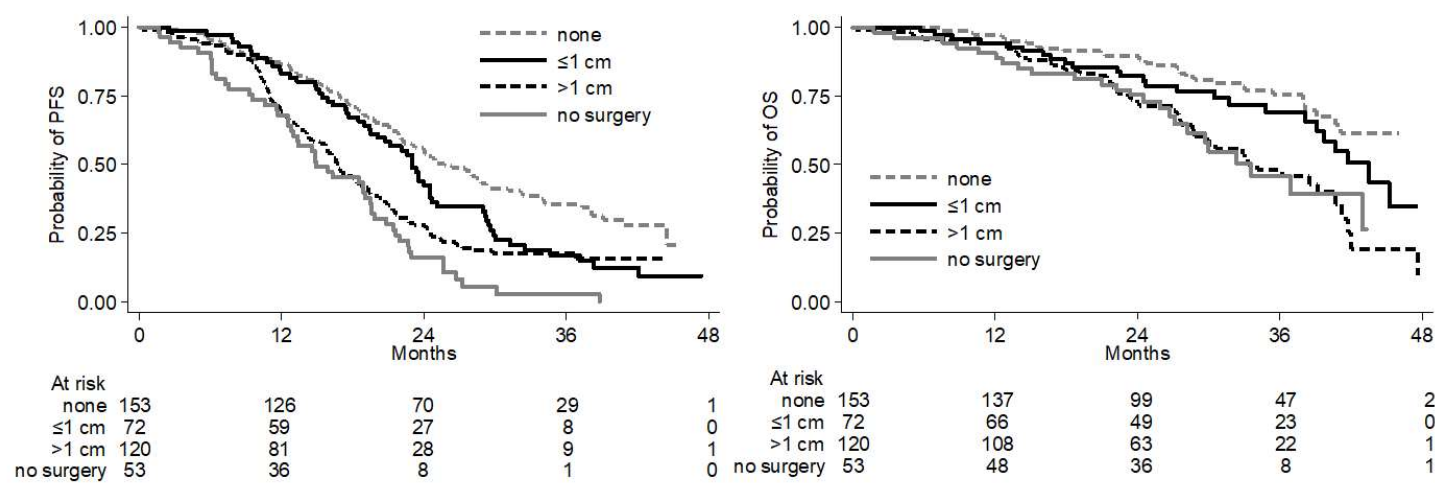

Figure A7. PFS (left) and OS (right) Kaplan Meier curves according to baseline hypertension/antihypertensive treatment

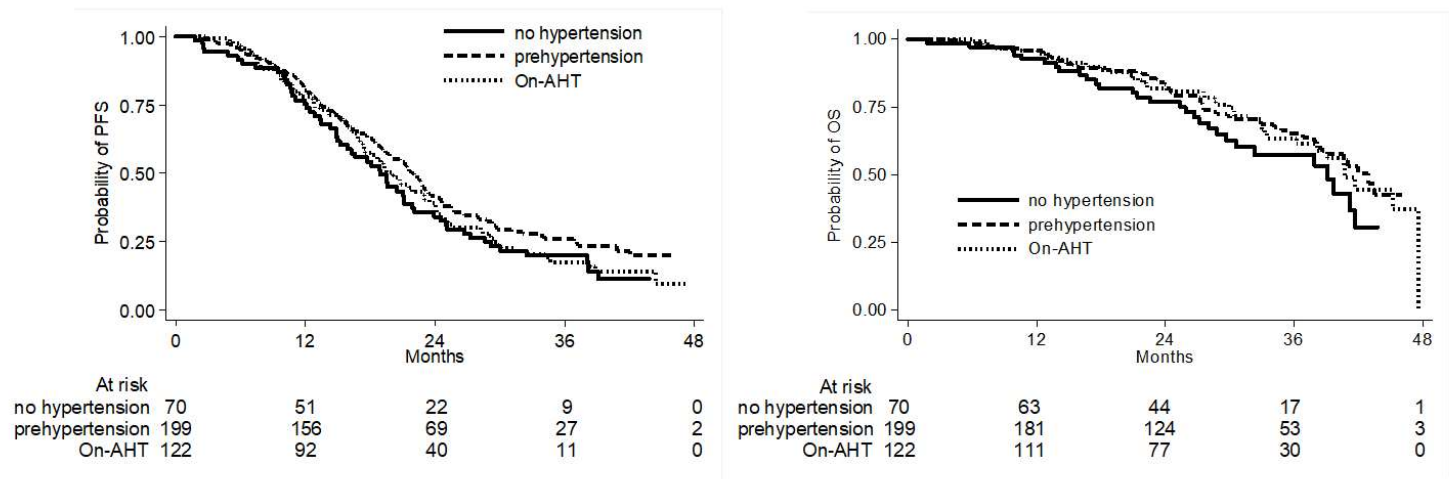



**Figure A8. PFS (left) and OS (right) Simon and Makush's modified Kaplan Meier curves according to occurrence of hypertension (grade  $\geq 2$ ) during treatment. Inner graph: cumulative frequency of hypertension (grade  $\geq 2$ )**

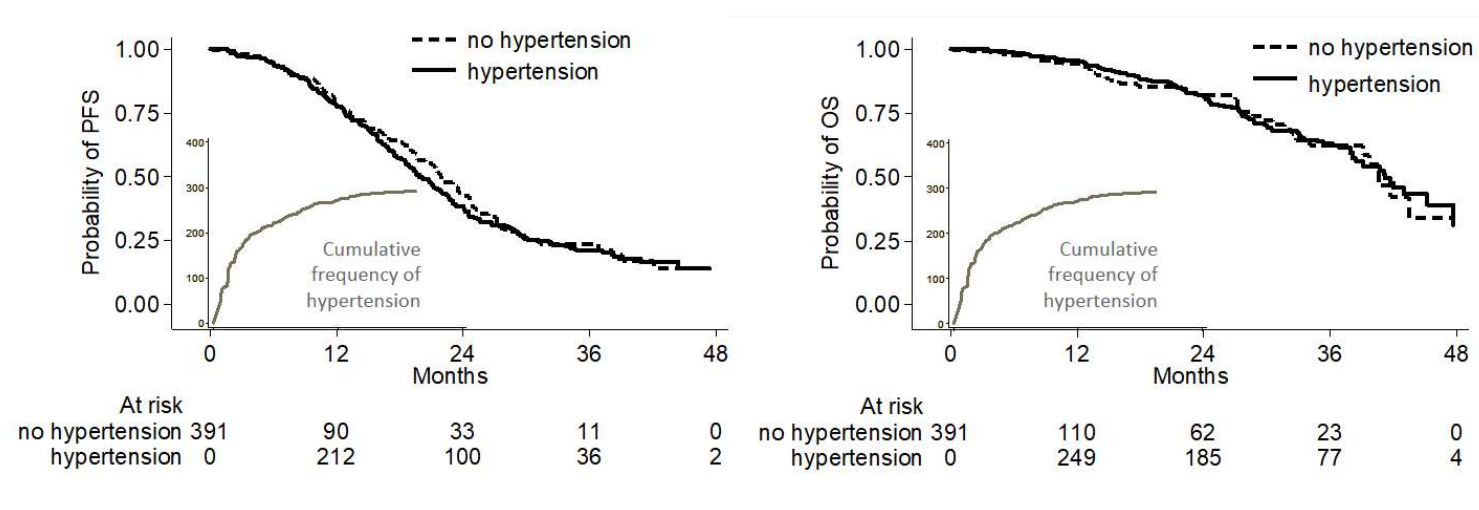

**Table A1: Adverse events occurring in <5% of patients, ordered by CTCAE category and grade**

| Adverse event                         | Grade 1 |       | Grade 2 |       | Grade 3 |       | Grade 4 |       |
|---------------------------------------|---------|-------|---------|-------|---------|-------|---------|-------|
|                                       | n       | (%)   | n       | (%)   | n       | (%)   | n       | (%)   |
| <b>BLOOD AND LYMPHATIC SYSTEM</b>     |         |       |         |       |         |       |         |       |
| Leukocytosis                          | 0       | (0.0) | 0       | (0.0) | 2       | (0.5) | 0       | (0.0) |
| Other                                 | 3       | (0.8) | 1       | (0.3) | 0       | (0.0) | 0       | (0.0) |
| Febrile neutropenia                   | 0       | (0.0) | 0       | (0.0) | 5       | (1.3) | 7       | (1.8) |
| <b>CARDIAC</b>                        |         |       |         |       |         |       |         |       |
| Myocardial infarction                 | 0       | (0.0) | 0       | (0.0) | 1       | (0.3) | 0       | (0.0) |
| Sinus bradycardia                     | 1       | (0.3) | 0       | (0.0) | 0       | (0.0) | 0       | (0.0) |
| Heart failure                         | 1       | (0.3) | 0       | (0.0) | 1       | (0.3) | 0       | (0.0) |
| Sinus tachycardia                     | 1       | (0.3) | 1       | (0.3) | 0       | (0.0) | 0       | (0.0) |
| Left ventricular systolic dysfunction | 0       | (0.0) | 0       | (0.0) | 3       | (0.8) | 0       | (0.0) |
| Atrial fibrillation                   | 1       | (0.3) | 2       | (0.5) | 1       | (0.3) | 0       | (0.0) |
| Palpitations                          | 5       | (1.3) | 0       | (0.0) | 0       | (0.0) | 0       | (0.0) |
| Other                                 | 6       | (1.5) | 0       | (0.0) | 1       | (0.3) | 0       | (0.0) |
| <b>EAR AND LABYRINTH</b>              |         |       |         |       |         |       |         |       |
| Ear pain                              | 1       | (0.3) | 0       | (0.0) | 0       | (0.0) | 0       | (0.0) |
| Tinnitus                              | 1       | (0.3) | 0       | (0.0) | 0       | (0.0) | 0       | (0.0) |
| Other                                 | 2       | (0.5) | 2       | (0.5) | 0       | (0.0) | 0       | (0.0) |
| Vertigo                               | 10      | (2.6) | 1       | (0.3) | 0       | (0.0) | 0       | (0.0) |
| <b>ENDOCRINE</b>                      |         |       |         |       |         |       |         |       |
| Other                                 | 1       | (0.3) | 0       | (0.0) | 0       | (0.0) | 0       | (0.0) |
| <b>EYE</b>                            |         |       |         |       |         |       |         |       |
| Conjunctivitis                        | 1       | (0.3) | 0       | (0.0) | 0       | (0.0) | 0       | (0.0) |
| Dry eye                               | 1       | (0.3) | 0       | (0.0) | 0       | (0.0) | 0       | (0.0) |
| Extraocular muscle paresis            | 1       | (0.3) | 0       | (0.0) | 0       | (0.0) | 0       | (0.0) |
| Optic nerve disorder                  | 0       | (0.0) | 1       | (0.3) | 0       | (0.0) | 0       | (0.0) |
| Watering eyes                         | 2       | (0.5) | 0       | (0.0) | 0       | (0.0) | 0       | (0.0) |
| Blurred vision                        | 1       | (0.3) | 3       | (0.8) | 0       | (0.0) | 0       | (0.0) |
| Eye disorders - Other, specify        | 7       | (1.8) | 2       | (0.5) | 0       | (0.0) | 0       | (0.0) |
| <b>GASTROINTESTINAL</b>               |         |       |         |       |         |       |         |       |
| Anal fistula                          | 0       | (0.0) | 0       | (0.0) | 1       | (0.3) | 0       | (0.0) |
| Anal hemorrhage                       | 0       | (0.0) | 1       | (0.3) | 0       | (0.0) | 0       | (0.0) |
| Anal pain                             | 1       | (0.3) | 0       | (0.0) | 0       | (0.0) | 0       | (0.0) |
| Anal ulcer                            | 0       | (0.0) | 1       | (0.3) | 0       | (0.0) | 0       | (0.0) |
| Gastric fistula                       | 1       | (0.3) | 0       | (0.0) | 0       | (0.0) | 0       | (0.0) |
| Gastric hemorrhage                    | 0       | (0.0) | 1       | (0.3) | 0       | (0.0) | 0       | (0.0) |
| Gastroesophageal reflux disease       | 1       | (0.3) | 0       | (0.0) | 0       | (0.0) | 0       | (0.0) |
| Gastrointestinal fistula              | 0       | (0.0) | 0       | (0.0) | 1       | (0.3) | 0       | (0.0) |
| Gingival pain                         | 0       | (0.0) | 1       | (0.3) | 0       | (0.0) | 0       | (0.0) |
| Hemorrhoids                           | 0       | (0.0) | 1       | (0.3) | 0       | (0.0) | 0       | (0.0) |
| Ileal stenosis                        | 0       | (0.0) | 0       | (0.0) | 1       | (0.3) | 0       | (0.0) |
| Periodontal disease                   | 1       | (0.3) | 0       | (0.0) | 0       | (0.0) | 0       | (0.0) |
| Rectal pain                           | 0       | (0.0) | 1       | (0.3) | 0       | (0.0) | 0       | (0.0) |
| Toothache                             | 0       | (0.0) | 1       | (0.3) | 0       | (0.0) | 0       | (0.0) |
| Upper gastrointestinal hemorrhage     | 1       | (0.3) | 0       | (0.0) | 0       | (0.0) | 0       | (0.0) |
| Colitis                               | 2       | (0.5) | 0       | (0.0) | 0       | (0.0) | 0       | (0.0) |
| Flatulence                            | 2       | (0.5) | 0       | (0.0) | 0       | (0.0) | 0       | (0.0) |
| Rectal hemorrhage                     | 1       | (0.3) | 1       | (0.3) | 0       | (0.0) | 0       | (0.0) |
| Small intestinal obstruction          | 0       | (0.0) | 0       | (0.0) | 2       | (0.5) | 0       | (0.0) |
| Small intestinal perforation          | 0       | (0.0) | 1       | (0.3) | 1       | (0.3) | 0       | (0.0) |
| Stomach pain                          | 1       | (0.3) | 1       | (0.3) | 0       | (0.0) | 0       | (0.0) |
| Abdominal distension                  | 2       | (0.5) | 1       | (0.3) | 0       | (0.0) | 0       | (0.0) |
| Ascites                               | 1       | (0.3) | 1       | (0.3) | 1       | (0.3) | 0       | (0.0) |
| Colonic obstruction                   | 0       | (0.0) | 1       | (0.3) | 3       | (0.8) | 0       | (0.0) |
| Gastritis                             | 2       | (0.5) | 2       | (0.5) | 0       | (0.0) | 0       | (0.0) |
| Dyspepsia                             | 6       | (1.5) | 0       | (0.0) | 0       | (0.0) | 0       | (0.0) |

| Adverse event                                         | Grade 1 |       | Grade 2 |       | Grade 3 |       | Grade 4 |       |
|-------------------------------------------------------|---------|-------|---------|-------|---------|-------|---------|-------|
|                                                       | n       | (%)   | n       | (%)   | n       | (%)   | n       | (%)   |
| Gastrointestinal pain                                 | 4       | (1.0) | 2       | (0.5) | 0       | (0.0) | 0       | (0.0) |
| <b>GENERAL DISORDERS</b>                              |         |       |         |       |         |       |         |       |
| Localized edema                                       | 0       | (0.0) | 1       | (0.3) | 0       | (0.0) | 0       | (0.0) |
| Flu like symptoms                                     | 2       | (0.5) | 0       | (0.0) | 0       | (0.0) | 0       | (0.0) |
| Edema limbs                                           | 3       | (0.8) | 1       | (0.3) | 0       | (0.0) | 0       | (0.0) |
| <b>HEPATOBIILIARY</b>                                 |         |       |         |       |         |       |         |       |
| Cholecystitis                                         | 0       | (0.0) | 0       | (0.0) | 1       | (0.3) | 0       | (0.0) |
| Hepatic pain                                          | 1       | (0.3) | 0       | (0.0) | 0       | (0.0) | 0       | (0.0) |
| <b>IMMUNE SYSTEM</b>                                  |         |       |         |       |         |       |         |       |
| Other                                                 | 0       | (0.0) | 1       | (0.3) | 0       | (0.0) | 0       | (0.0) |
| <b>INFECTIONS AND INFESTATIONS</b>                    |         |       |         |       |         |       |         |       |
| Abdominal infection                                   | 0       | (0.0) | 0       | (0.0) | 0       | (0.0) | 1       | (0.3) |
| Anorectal infection                                   | 0       | (0.0) | 1       | (0.3) | 0       | (0.0) | 0       | (0.0) |
| Bronchial infection                                   | 0       | (0.0) | 1       | (0.3) | 0       | (0.0) | 0       | (0.0) |
| Device related infection                              | 0       | (0.0) | 0       | (0.0) | 1       | (0.3) | 0       | (0.0) |
| Nail infection                                        | 1       | (0.3) | 0       | (0.0) | 0       | (0.0) | 0       | (0.0) |
| Paronychia                                            | 0       | (0.0) | 1       | (0.3) | 0       | (0.0) | 0       | (0.0) |
| Peritoneal infection                                  | 0       | (0.0) | 0       | (0.0) | 1       | (0.3) | 0       | (0.0) |
| Pharyngitis                                           | 0       | (0.0) | 1       | (0.3) | 0       | (0.0) | 0       | (0.0) |
| Rhinitis infective                                    | 0       | (0.0) | 1       | (0.3) | 0       | (0.0) | 0       | (0.0) |
| Sinusitis                                             | 0       | (0.0) | 1       | (0.3) | 0       | (0.0) | 0       | (0.0) |
| Small intestine infection                             | 0       | (0.0) | 0       | (0.0) | 1       | (0.3) | 0       | (0.0) |
| Tooth infection                                       | 0       | (0.0) | 1       | (0.3) | 0       | (0.0) | 0       | (0.0) |
| Bladder infection                                     | 0       | (0.0) | 2       | (0.5) | 0       | (0.0) | 0       | (0.0) |
| Breast infection                                      | 0       | (0.0) | 2       | (0.5) | 0       | (0.0) | 0       | (0.0) |
| Catheter related infection                            | 0       | (0.0) | 2       | (0.5) | 0       | (0.0) | 0       | (0.0) |
| Upper respiratory infection                           | 0       | (0.0) | 2       | (0.5) | 0       | (0.0) | 0       | (0.0) |
| Vulval infection                                      | 0       | (0.0) | 1       | (0.3) | 1       | (0.3) | 0       | (0.0) |
| Wound infection                                       | 0       | (0.0) | 1       | (0.3) | 1       | (0.3) | 0       | (0.0) |
| Sepsis                                                | 0       | (0.0) | 0       | (0.0) | 0       | (0.0) | 3       | (0.8) |
| Skin infection                                        | 2       | (0.5) | 2       | (0.5) | 0       | (0.0) | 0       | (0.0) |
| Other                                                 | 5       | (1.3) | 9       | (2.3) | 1       | (0.3) | 0       | (0.0) |
| <b>INJURY, POISONING AND PROCEDURAL COMPLICATIONS</b> |         |       |         |       |         |       |         |       |
| Postoperative hemorrhage                              | 1       | (0.3) | 0       | (0.0) | 0       | (0.0) | 0       | (0.0) |
| Urostomy obstruction                                  | 0       | (0.0) | 0       | (0.0) | 1       | (0.3) | 0       | (0.0) |
| Fracture                                              | 0       | (0.0) | 0       | (0.0) | 2       | (0.5) | 0       | (0.0) |
| Wound dehiscence                                      | 3       | (0.8) | 0       | (0.0) | 0       | (0.0) | 0       | (0.0) |
| <b>INVESTIGATIONS</b>                                 |         |       |         |       |         |       |         |       |
| Cholesterol high                                      | 1       | (0.3) | 0       | (0.0) | 0       | (0.0) | 0       | (0.0) |
| Lymphocyte count decreased                            | 0       | (0.0) | 0       | (0.0) | 1       | (0.3) | 0       | (0.0) |
| Urine output decreased                                | 0       | (0.0) | 0       | (0.0) | 0       | (0.0) | 1       | (0.3) |
| Weight gain                                           | 1       | (0.3) | 0       | (0.0) | 0       | (0.0) | 0       | (0.0) |
| Blood bilirubin increased                             | 5       | (1.3) | 1       | (0.3) | 0       | (0.0) | 0       | (0.0) |
| GGT increased                                         | 4       | (1.0) | 0       | (0.0) | 2       | (0.5) | 0       | (0.0) |
| Creatinine increased                                  | 8       | (2.0) | 1       | (0.3) | 0       | (0.0) | 0       | (0.0) |
| Investigations - Other, specify                       | 9       | (2.3) | 1       | (0.3) | 1       | (0.3) | 0       | (0.0) |
| Weight loss                                           | 7       | (1.8) | 5       | (1.3) | 2       | (0.5) | 0       | (0.0) |
| Alkaline phosphatase increased                        | 15      | (3.8) | 2       | (0.5) | 1       | (0.3) | 0       | (0.0) |
| <b>METABOLISM AND NUTRITION</b>                       |         |       |         |       |         |       |         |       |
| Hypertriglyceridemia                                  | 1       | (0.3) | 0       | (0.0) | 0       | (0.0) | 0       | (0.0) |
| Hypocalcemia                                          | 1       | (0.3) | 0       | (0.0) | 0       | (0.0) | 0       | (0.0) |
| Hyponatremia                                          | 1       | (0.3) | 0       | (0.0) | 0       | (0.0) | 0       | (0.0) |
| Dehydration                                           | 1       | (0.3) | 0       | (0.0) | 1       | (0.3) | 0       | (0.0) |
| Hypercalcemia                                         | 2       | (0.5) | 0       | (0.0) | 0       | (0.0) | 0       | (0.0) |
| Hyperkalemia                                          | 2       | (0.5) | 0       | (0.0) | 0       | (0.0) | 0       | (0.0) |
| Hypoglycemia                                          | 2       | (0.5) | 0       | (0.0) | 0       | (0.0) | 0       | (0.0) |
| Hypokalemia                                           | 2       | (0.5) | 0       | (0.0) | 0       | (0.0) | 0       | (0.0) |
| Hypoalbuminemia                                       | 3       | (0.8) | 0       | (0.0) | 0       | (0.0) | 0       | (0.0) |

| Adverse event                                             | Grade 1 |       | Grade 2 |       | Grade 3 |       | Grade 4 |       |
|-----------------------------------------------------------|---------|-------|---------|-------|---------|-------|---------|-------|
|                                                           | n       | (%)   | n       | (%)   | n       | (%)   | n       | (%)   |
| Metabolism and nutrition disorders - Other, specify       | 2       | (0.5) | 1       | (0.3) | 0       | (0.0) | 0       | (0.0) |
| Hyperuricemia                                             | 4       | (1.0) | 0       | (0.0) | 0       | (0.0) | 0       | (0.0) |
| Hypomagnesemia                                            | 10      | (2.6) | 0       | (0.0) | 0       | (0.0) | 0       | (0.0) |
| <b>MUSCULOSKELETAL AND CONNECTIVE TISSUE</b>              |         |       |         |       |         |       |         |       |
| Joint effusion                                            | 1       | (0.3) | 0       | (0.0) | 0       | (0.0) | 0       | (0.0) |
| Osteonecrosis of jaw                                      | 0       | (0.0) | 1       | (0.3) | 0       | (0.0) | 0       | (0.0) |
| Chest wall pain                                           | 2       | (0.5) | 0       | (0.0) | 0       | (0.0) | 0       | (0.0) |
| Neck pain                                                 | 1       | (0.3) | 1       | (0.3) | 0       | (0.0) | 0       | (0.0) |
| Generalized muscle weakness                               | 2       | (0.5) | 1       | (0.3) | 0       | (0.0) | 0       | (0.0) |
| Muscle weakness lower limb                                | 2       | (0.5) | 1       | (0.3) | 0       | (0.0) | 0       | (0.0) |
| Back pain                                                 | 3       | (0.8) | 1       | (0.3) | 0       | (0.0) | 0       | (0.0) |
| Osteoporosis                                              | 4       | (1.0) | 0       | (0.0) | 0       | (0.0) | 0       | (0.0) |
| Pain in extremity                                         | 7       | (1.8) | 0       | (0.0) | 0       | (0.0) | 0       | (0.0) |
| Arthritis                                                 | 8       | (2.0) | 5       | (1.3) | 0       | (0.0) | 0       | (0.0) |
| Bone pain                                                 | 15      | (3.8) | 1       | (0.3) | 0       | (0.0) | 0       | (0.0) |
| <b>NEOPLASMS BENIGN, MALIGNANT AND UNSPECIFIED</b>        |         |       |         |       |         |       |         |       |
| Other                                                     | 0       | (0.0) | 0       | (0.0) | 2       | (0.5) | 1       | (0.3) |
| <b>NERVOUS SYSTEM</b>                                     |         |       |         |       |         |       |         |       |
| Aphonia                                                   | 0       | (0.0) | 0       | (0.0) | 1       | (0.3) | 0       | (0.0) |
| Cognitive disturbance                                     | 0       | (0.0) | 0       | (0.0) | 1       | (0.3) | 0       | (0.0) |
| Depressed level of consciousness                          | 1       | (0.3) | 0       | (0.0) | 0       | (0.0) | 0       | (0.0) |
| Intracranial hemorrhage                                   | 0       | (0.0) | 0       | (0.0) | 1       | (0.3) | 0       | (0.0) |
| Presyncope                                                | 0       | (0.0) | 1       | (0.3) | 0       | (0.0) | 0       | (0.0) |
| Somnolence                                                | 1       | (0.3) | 0       | (0.0) | 0       | (0.0) | 0       | (0.0) |
| Dizziness                                                 | 2       | (0.5) | 0       | (0.0) | 0       | (0.0) | 0       | (0.0) |
| Memory impairment                                         | 1       | (0.3) | 1       | (0.3) | 0       | (0.0) | 0       | (0.0) |
| Transient ischemic attacks                                | 3       | (0.8) | 0       | (0.0) | 0       | (0.0) | 0       | (0.0) |
| Dysgeusia                                                 | 5       | (1.3) | 1       | (0.3) | 0       | (0.0) | 0       | (0.0) |
| Other                                                     | 8       | (2.0) | 7       | (1.8) | 0       | (0.0) | 0       | (0.0) |
| <b>PSYCHIATRIC</b>                                        |         |       |         |       |         |       |         |       |
| Depression                                                | 2       | (0.5) | 1       | (0.3) | 0       | (0.0) | 0       | (0.0) |
| Insomnia                                                  | 2       | (0.5) | 1       | (0.3) | 0       | (0.0) | 0       | (0.0) |
| Psychiatric disorders - Other, specify                    | 2       | (0.5) | 2       | (0.5) | 0       | (0.0) | 0       | (0.0) |
| Anxiety                                                   | 3       | (0.8) | 2       | (0.5) | 0       | (0.0) | 0       | (0.0) |
| <b>RENAL AND URINARY</b>                                  |         |       |         |       |         |       |         |       |
| Acute kidney injury                                       | 1       | (0.3) | 0       | (0.0) | 0       | (0.0) | 0       | (0.0) |
| Renal calculi                                             | 1       | (0.3) | 0       | (0.0) | 0       | (0.0) | 0       | (0.0) |
| Renal colic                                               | 0       | (0.0) | 1       | (0.3) | 0       | (0.0) | 0       | (0.0) |
| Urinary tract obstruction                                 | 0       | (0.0) | 0       | (0.0) | 1       | (0.3) | 0       | (0.0) |
| Hematuria                                                 | 1       | (0.3) | 0       | (0.0) | 1       | (0.3) | 0       | (0.0) |
| Hemoglobinuria                                            | 2       | (0.5) | 0       | (0.0) | 0       | (0.0) | 0       | (0.0) |
| Urinary tract pain                                        | 1       | (0.3) | 1       | (0.3) | 0       | (0.0) | 0       | (0.0) |
| Urinary incontinence                                      | 3       | (0.8) | 0       | (0.0) | 0       | (0.0) | 0       | (0.0) |
| Cystitis noninfective                                     | 3       | (0.8) | 1       | (0.3) | 0       | (0.0) | 0       | (0.0) |
| Urinary frequency                                         | 3       | (0.8) | 1       | (0.3) | 0       | (0.0) | 0       | (0.0) |
| <b>REPRODUCTIVE SYSTEM AND BREAST DISORDERS</b>           |         |       |         |       |         |       |         |       |
| Pelvic pain                                               | 1       | (0.3) | 0       | (0.0) | 0       | (0.0) | 0       | (0.0) |
| Vaginal discharge                                         | 1       | (0.3) | 0       | (0.0) | 0       | (0.0) | 0       | (0.0) |
| Reproductive system and breast disorders - Other, specify | 1       | (0.3) | 1       | (0.3) | 0       | (0.0) | 0       | (0.0) |
| Vaginal fistula                                           | 0       | (0.0) | 1       | (0.3) | 1       | (0.3) | 0       | (0.0) |
| Vaginal hemorrhage                                        | 4       | (1.0) | 1       | (0.3) | 0       | (0.0) | 0       | (0.0) |

| Adverse event                                | Grade 1 |       | Grade 2 |       | Grade 3 |       | Grade 4 |       |
|----------------------------------------------|---------|-------|---------|-------|---------|-------|---------|-------|
|                                              | n       | (%)   | n       | (%)   | n       | (%)   | n       | (%)   |
| <b>RESPIRATORY. THORACIC AND MEDIASTINAL</b> |         |       |         |       |         |       |         |       |
| Allergic rhinitis                            | 1       | (0.3) | 0       | (0.0) | 0       | (0.0) | 0       | (0.0) |
| Bronchospasm                                 | 0       | (0.0) | 0       | (0.0) | 1       | (0.3) | 0       | (0.0) |
| Pharyngeal hemorrhage                        | 1       | (0.3) | 0       | (0.0) | 0       | (0.0) | 0       | (0.0) |
| Pharyngeal mucositis                         | 0       | (0.0) | 1       | (0.3) | 0       | (0.0) | 0       | (0.0) |
| Pharyngolaryngeal pain                       | 1       | (0.3) | 0       | (0.0) | 0       | (0.0) | 0       | (0.0) |
| Pneumothorax                                 | 0       | (0.0) | 0       | (0.0) | 1       | (0.3) | 0       | (0.0) |
| Sinus disorder                               | 1       | (0.3) | 0       | (0.0) | 0       | (0.0) | 0       | (0.0) |
| Bronchial obstruction                        | 0       | (0.0) | 2       | (0.5) | 0       | (0.0) | 0       | (0.0) |
| Voice alteration                             | 2       | (0.5) | 0       | (0.0) | 0       | (0.0) | 0       | (0.0) |
| Pneumonitis                                  | 0       | (0.0) | 3       | (0.8) | 0       | (0.0) | 0       | (0.0) |
| Dyspnea                                      | 6       | (1.5) | 1       | (0.3) | 1       | (0.3) | 0       | (0.0) |
| Cough                                        | 13      | (3.3) | 4       | (1.0) | 0       | (0.0) | 0       | (0.0) |
| <b>SKIN AND SUBCUTANEOUS TISSUE</b>          |         |       |         |       |         |       |         |       |
| Hirsutism                                    | 1       | (0.3) | 0       | (0.0) | 0       | (0.0) | 0       | (0.0) |
| Hypertrichosis                               | 1       | (0.3) | 0       | (0.0) | 0       | (0.0) | 0       | (0.0) |
| Nail loss                                    | 1       | (0.3) | 0       | (0.0) | 0       | (0.0) | 0       | (0.0) |
| Palmar-plantar erythrodysesthesia syndrome   | 1       | (0.3) | 0       | (0.0) | 0       | (0.0) | 0       | (0.0) |
| Purpura                                      | 1       | (0.3) | 0       | (0.0) | 0       | (0.0) | 0       | (0.0) |
| Skin hyperpigmentation                       | 1       | (0.3) | 0       | (0.0) | 0       | (0.0) | 0       | (0.0) |
| Nail discoloration                           | 2       | (0.5) | 0       | (0.0) | 0       | (0.0) | 0       | (0.0) |
| Pain of skin                                 | 2       | (0.5) | 0       | (0.0) | 0       | (0.0) | 0       | (0.0) |
| Dry skin                                     | 3       | (0.8) | 0       | (0.0) | 0       | (0.0) | 0       | (0.0) |
| Urticaria                                    | 2       | (0.5) | 0       | (0.0) | 1       | (0.3) | 0       | (0.0) |
| Skin ulceration                              | 2       | (0.5) | 1       | (0.3) | 1       | (0.3) | 0       | (0.0) |
| Rash maculo-papular                          | 4       | (1.0) | 1       | (0.3) | 0       | (0.0) | 0       | (0.0) |
| Erythema multiforme                          | 3       | (0.8) | 3       | (0.8) | 0       | (0.0) | 0       | (0.0) |
| Rash acneiform                               | 4       | (1.0) | 3       | (0.8) | 0       | (0.0) | 0       | (0.0) |
| Pruritus                                     | 11      | (2.8) | 2       | (0.5) | 0       | (0.0) | 0       | (0.0) |
| <b>SURGICAL AND MEDICAL PROCEDURES</b>       |         |       |         |       |         |       |         |       |
| Other                                        | 1       | (0.3) | 1       | (0.3) | 3       | (0.8) | 0       | (0.0) |
| <b>VASCULAR</b>                              |         |       |         |       |         |       |         |       |
| Lymphocele                                   | 0       | (0.0) | 0       | (0.0) | 1       | (0.3) | 0       | (0.0) |
| Lymphedema                                   | 2       | (0.5) | 1       | (0.3) | 0       | (0.0) | 0       | (0.0) |
| Superficial thrombophlebitis                 | 0       | (0.0) | 3       | (0.8) | 0       | (0.0) | 0       | (0.0) |
| Hot flashes                                  | 4       | (1.0) | 0       | (0.0) | 0       | (0.0) | 0       | (0.0) |
| Phlebitis                                    | 0       | (0.0) | 6       | (1.5) | 0       | (0.0) | 0       | (0.0) |
| Hypotension                                  | 9       | (2.3) | 1       | (0.3) | 0       | (0.0) | 0       | (0.0) |
| Other                                        | 7       | (1.8) | 3       | (0.8) | 0       | (0.0) | 0       | (0.0) |

**Table A2. Summary of compliance**

|                                                    | Carboplatin               | Paclitaxel                     | Bevacizumab<br>(combined)   | Bevacizumab<br>(maintenance) |
|----------------------------------------------------|---------------------------|--------------------------------|-----------------------------|------------------------------|
| <b>Started treatment</b>                           | 398                       | 396                            | 396                         | 344                          |
| <b>Number of cycles received,<br/>median (IQR)</b> | 6 (6-6)                   | 6 (6-6)                        | 6 (5-6)                     | 15.5 (9-16)                  |
| <b>Administered total dose,<br/>median (IQR)</b>   | 29.7 (27.4-30.0)<br>AUC   | 1040 (967.2-1050)<br>mg/kg     | 87 (72-90)<br>mg/kg         | 227 (135-240)<br>mg/kg       |
| <b>Weekly dose intensity, median<br/>(IQR)</b>     | 1.5 AUC/week<br>(1.2-1.6) | 52.1 mg/kg/week<br>(43.2-55.9) | 4.1 (3.1-4.7)<br>mg/kg/week | 4.8 (4.5-5)<br>mg/kg/week    |
| <b>Relative weekly dose<br/>intensity, median</b>  | 89%                       | 89%                            | 82%                         | 96%                          |

**List of participating Institutions, physicians, nurses and trial coordinators/data managers**

| <b>Institution</b>                                                                                                                                                                                   | <b>Physicians</b>                                                                                                     | <b>Nurses</b>              | <b>Trial coordinators, data managers</b>                 |
|------------------------------------------------------------------------------------------------------------------------------------------------------------------------------------------------------|-----------------------------------------------------------------------------------------------------------------------|----------------------------|----------------------------------------------------------|
| Dipartimento di chirurgia, SC Chirurgia Ginecologica, Fondazione IRCCS Istituto Nazionale Tumori, Milano                                                                                             | Francesco Raspagliesi, Giorgio Bogani, Domenica Lorusso                                                               |                            | Dominique Ronzulli, Antonia Martinetti, Elisa Sottotetti |
| Dipartimento di scienze della salute della donna, del bambino e di sanità pubblica, Ginecologia Oncologica, Fondazione Policlinico Universitario Gemelli, Università Cattolica del Sacro Cuore, Roma | Giovanni Scambia, Vanda Salutari, Mariagrazia Distefano                                                               |                            |                                                          |
| Oncologia Clinica Sperimentale Uro-Ginecologica, Ginecologia Oncologica, Istituto Nazionale Tumori, IRCCS Fondazione G.Pascale, Napoli                                                               | Sandro Pignata, Carmela Pisano, Sabrina Chiara Cecere, Laura Attademo, Sara Centonze, Iole Ventriglia, Stefano Greggi |                            | Patrizia Piccirillo                                      |
| Istituto Europeo di Oncologia IRCCS, and Dipartimento di Medicina e Chirurgia, Università degli Studi di Milano-Bicocca, Milano                                                                      | Nicoletta Colombo, Eleonora Zaccarelli                                                                                | Ada Sbriglia               | Abbondanza Montinaro                                     |
| Oncologia Medica II e Radiologia, Istituto Oncologico Veneto IRCCS, and University of Padova                                                                                                         | Simona Frezzini, Margherita Nardin                                                                                    | Elena Marchi, Chiara Lando |                                                          |
| Divisione di Ostetricia e Ginecologia, ASST Spedali Civili di Brescia, Università di Brescia                                                                                                         | Germana Tognon, Martina Ratti                                                                                         | Rosangela Guerini          | Eliana Bignotti                                          |
| Oncologia ed Ematologia U.L.S.S. 13, Mirano (VE)                                                                                                                                                     | Grazia Artioli, Lucia Borgato                                                                                         |                            | Silvia Coccato                                           |
| Dipartimento di Medicina Clinica e Sperimentale, UO Ginecologia e Ostetricia, Università di Pisa                                                                                                     | Angiolo Gadducci, Stefania Cosio                                                                                      |                            |                                                          |
| Oncologia Medica, Dipartimento di Medicina Clinica e Chirurgia Università di Napoli Federico II, Napoli                                                                                              | Rossella Lauria, Cinzia Cardalesi, Carmine De Angelis, Michela Izzo                                                   |                            |                                                          |
| Divisione Universitaria di Ginecologia e Ostetricia, AO Ordine Mauriziano, Torino                                                                                                                    | Annamaria Ferrero, Elisa Tripodi, Valentina Zanfagnin                                                                 |                            |                                                          |
| Oncologia Medica, Ospedale Senatore Antonio Perrino, Brindisi                                                                                                                                        | Saverio Cinieri, Enrica Mazzoni, Gabriella Del Bene, Maria D'Amico                                                    | Liana Falcone              | Margherita Cinefra                                       |
| Oncologia Medica, Ospedali Galliera, Genova                                                                                                                                                          | Andrea De Censi                                                                                                       |                            | Domenico Marra, Silvia Caviglia                          |
| Dipartimento di Oncologia, Ospedale S. Giovanni Calibita Fatebenefratelli, Roma                                                                                                                      | Enrico Breda                                                                                                          |                            |                                                          |

| <b>Institution</b>                                                                                             | <b>Physicians</b>                                                         | <b>Nurses</b>                       | <b>Trial coordinators, data managers</b> |
|----------------------------------------------------------------------------------------------------------------|---------------------------------------------------------------------------|-------------------------------------|------------------------------------------|
| Divisione di Ostetricia e Ginecologia, Ospedale Cannizzaro, Catania                                            | Paolo Scollo                                                              |                                     |                                          |
| Oncologia Medica, Istituto Scientifico Romagnolo per lo Studio e la Cura dei Tumori (IRST) IRCCS, Meldola (FC) | Ugo De Giorgi                                                             | Alessia Filograna                   | Valentina Gallà                          |
| Ginecologia Chirurgica, Ospedale S. Gerardo, Monza (MI)                                                        | Andrea Alberto Lissoni                                                    |                                     |                                          |
| Ospedale Ostetrico Ginecologico S. Anna, Torino                                                                | Dionissios Katsaros, Emilie Marion Canuto, Fulvio Borella                 |                                     |                                          |
| Oncologia Medica, A.U.S.L. di Reggio Emilia, IRCCS Presidio Arcispedale S. Maria Nuova, Reggio Emilia          | Alessandra Bologna                                                        |                                     | Dr.ssa Erika Gervasi                     |
| SOC Oncologia Medica e Prevenzione Oncologica, Centro di Riferimento Oncologico, Aviano (PN)                   | Simona Scalone                                                            | Anna Maria Colussi                  | Dr Gianna Tabaro                         |
| Oncologia Medica - AOU Policlinico di Modena                                                                   | Cinzia Baldessari                                                         |                                     | Elisa Pettorelli                         |
| U.O.C. Oncologia Medica A.O.Garibaldi Nesima, Catania                                                          | Roberto Bordonaro, Concetta Martines                                      | Marisa Mammone                      | Francesco Avola                          |
| Day Hospital Oncologico Ospedale Guastalla (RE)                                                                | Filippo Giovanardi, Stefania Lui                                          |                                     |                                          |
| Oncologia Medica, Azienda Ospedaliera San Pio, Benevento                                                       | Domenico Germano, Vincenza Tinessa, Emiddio Barletta, Marianna Bareschino | Daniela Colucci, Raffelina Zampetti |                                          |
| Dipartimento di Oncologia, A.O.U. S. Maria della Misericordia, Udine                                           | Claudia Andreetta, Paola Ermacora                                         |                                     |                                          |
| Ospedale Mater Salutis Oncologia Medica, AULSS 21, Legnago (VR)                                                | Filippo Greco                                                             |                                     | Eva Pigozzi                              |
| Ginecologia e Ostetricia, Ospedale Del Ponte, Varese                                                           | Nicoletta Donadello, Chiara Apolloni                                      |                                     | Simona Carollo                           |
| UOC Medicina Oncologica, Ospedale Ramazzini di Carpi, Day Hospital Ospedale di Mirandola                       | Lucia Longo, Donatella Giardina                                           |                                     | Giorgia Razzini                          |
| Oncologia Ospedale S.Vito, Centro di Riferimento Oncologico di Aviano (PN)                                     | Alessandro Del Conte                                                      | Marta Ballaben, Fabrizia Ambrosio   | Manuela Bertola                          |
| Ginecologia e Ostetricia, IRCCS Ospedale San Raffaele, Milano                                                  | Alice bergamini                                                           | Chiara Ritella                      | Giorgia Lupi                             |
| Ostetricia e Ginecologia, Fondazione IRCCS S. Matteo, Pavia                                                    | Chiara Cassani, Marianna Roccio, Francesca Zanellini, Luciana Babilonti   |                                     |                                          |
| UO di Oncologia Medica 1, IRCCS .S.Martino IST, Genova                                                         | Giuseppe Damiano, Maria Laura Iaia                                        |                                     |                                          |



| <b>Institution</b>                                                                                  | <b>Physicians</b>                                                       | <b>Nurses</b>                                                                              | <b>Trial coordinators, data managers</b>         |
|-----------------------------------------------------------------------------------------------------|-------------------------------------------------------------------------|--------------------------------------------------------------------------------------------|--------------------------------------------------|
| Dipartimento di Oncologia, SSD Mesotelioma, A.S.O. SS Antonio e Biagio e Cesare Arrigo, Alessandria | Vittorio Fusco, Giovanna Bellotti                                       |                                                                                            | Iolanda De Martino, Manuela Alessio              |
| Servizio di Oncologia Medica, Ospedale S. Croce A.O. Ospedali Riuniti Marche Nord, Fano (PS)        | Rodolfo Mattioli, Gianluca Laici, Luca Imperatori, Raffaella Bracci     | Sonia Profili, Claudia Gasparoli, Lorena Roberti, Giovanna Casavecchia, Roberta Mencarelli | Silvia Pelliccioni                               |
| Oncologia Medica, Fondazione del Piemonte per l'Oncologia, IRCCS di Candiolo (TO)                   | Massimo Aglietta, Giorgio Valabrega, Valentina Tuninetti, Gaia Giannone |                                                                                            |                                                  |
| Oncologia Medica, Istituto Sacro Cuore Don Calabria, Negrar di Valpolicella (VR)                    | Stefania Gori, Paola Agnese Cassandrini                                 | Sonia Zamboni                                                                              | Fabiana Marchetti                                |
| Oncologia Medica Osp. S. Maria della Misericordia, AO di Perugia                                    | Anna Maria Mosconi, Roberta Matocci                                     | Sara Medici                                                                                |                                                  |
| Istituto Nazionale Tumori Regina Elena, Roma                                                        | Enrico Vizza, Antonella Savarese, Mariantonia Carosi                    |                                                                                            |                                                  |
| Oncologia Medica, Osp. S. Maria delle Croci, AUSL di Ravenna                                        | Claudia Casanova                                                        |                                                                                            |                                                  |
| U.O di Oncologia Clinica, Azienda Ospedaliera Universitaria Arcispedale Sant'Anna, Ferrara          | Marina Marzola, Elena Mauro, Elisa Tiberi                               |                                                                                            |                                                  |
| Oncologia Medica, Ospedale degli Infermi Rimini, Ospedale Cervesi, Cattolica (RN)                   | Valentina Arcangeli                                                     |                                                                                            | Giuliana Drudi                                   |
| Ospedale A. Manzoni Lecco S.C. Oncologia Medica, Lecco (CO)                                         | Federica Villa, Alessandra Crippato                                     | Elena Rusconi                                                                              | Cristina Corbetta, Daniela Turoli, Carlo Curioni |
| Ginecologia ed Ostetricia, P.O. Manerbio AOD (BS)                                                   | Daniela Gatti, Vincenzo Scannapieco                                     | Melissa Ungari                                                                             | Francesca Chiudinelli                            |
| Divisione di Oncologia ed Ematologia Azienda Ospedaliera C.Poma, Mantova                            | Anita Rimanti, Giovanna Catania                                         |                                                                                            | Patrizia Morselli                                |
| DH Oncologia Medica, Ospedale Fabrizio Spaziani di Frosinone                                        | Filomena Narducci, Silvia Quadrini                                      |                                                                                            | Pasquale Buanne                                  |
| U.O. di Oncologia Medica, Ospedale Civile degli Infermi, Faenza (RA)                                | Stefano Tamberi                                                         |                                                                                            | Alessandra Piancastelli                          |
| Centro Sociale Oncologico, Azienda Sanitaria Universitaria Integrata di Trieste                     | Angela Denaro, Rita Ceccherini                                          |                                                                                            |                                                  |
| Oncoematologia, Ospedale Mater Domini, Università Magna Grecia, Catanzaro                           | Angela Salvino                                                          |                                                                                            |                                                  |
| Dipartimento di Oncologia, Istituto di Ricerche Farmacologiche Mario Negri (IRFMN), Milano          | Roldano Fossati                                                         |                                                                                            |                                                  |

| <b>Institution</b>                                                                            | <b>Physicians</b>                                                                                                               | <b>Nurses</b> | <b>Trial coordinators, data managers</b>                                                                                                                                                                  |
|-----------------------------------------------------------------------------------------------|---------------------------------------------------------------------------------------------------------------------------------|---------------|-----------------------------------------------------------------------------------------------------------------------------------------------------------------------------------------------------------|
| Unità Sperimentazioni Cliniche, Istituto Nazionale Tumori, IRCCS Fondazione G.Pascale, Napoli | Francesco Perrone,<br>Gennaro Daniele,<br>Maria Carmela Piccirillo,<br>Laura Arenare,<br>Piera Gargiulo,<br>Antonia Del Giudice | Jane Bryce    | Cristiana De Luca, Simona Bevilacqua, Giuliana Canzanella, Giovanni De Matteis, Manuela Florio, Marilena Martino, Fiorella Romano, Lucia Sparavigna, Alfonso Savio, Anna Gimigliano, Maria Teresa Ribecco |
